# Supplementary material
Source: publisher site journal article supplement (https://www.dovepress.com/article/242521)
Supplement: Supplementary file 1 [file get_supplementary_file.php]

Supplemental Figure S1. H2S protects against HG‑induced decrease in cell migration and tube formation of HUVECs. (A) Tube formation and (B) cell migration of HUVECs were detected using by Tube formation and Transwell migration assays. HUVECs were treated with 33 mM glucose (HG concentration), or pretreated with 400 μM NaHS before HG treatment. Experiments were repeated three times. Data are presented as the mean ± standard error of the mean. ***p* < 0.01 and ****p*<0.001 compared with the control group; #*p* < 0.05 and ##*p* < 0.01 compared with the group treated with HG; Con, control group; HG, high glucose (33 mM).
